# Supplementary material
Source: PubMed Central journal article supplement (PMC5076820)

Nuclear export of FoxO1 is associated with ERK Signaling in  $\beta$ -Cells lacking Insulin Receptors

**Teresa Mezza<sup>1,2,3</sup>, Jun Shirakawa<sup>1,3</sup>, Rachael Martinez<sup>1</sup>, Jiang Hu<sup>1</sup>,**

**Andrea Giaccari<sup>2</sup>, Rohit N. Kulkarni<sup>1</sup>**

<sup>1</sup> Islet Cell & Regenerative Biology, Joslin Diabetes Center, Department of Medicine, Brigham and Women's Hospital, Harvard Stem Cell Institute, Harvard Medical School, Boston, Massachusetts 02215

<sup>2</sup> Center for Endocrine and Metabolic Diseases, Policlinico Gemelli, Università Cattolica del Sacro Cuore, Rome, Italy

<sup>3</sup> Both authors contributed equally to this work.

## Supplemental file

### Supplementary Figure Legends

**Supplementary Fig. 1 Effects of inhibitors on phosphorylation of Akt and ERK under insulin and glucose stimulation in  $\beta$ -cells.** Intensity of the signals of western blotting in Fig. 8C quantified by densitometry (n = 4).

**Supplementary Fig. 2 Effects of OSI-906 on phosphorylation of insulin and IGF-1 receptors, Akt and ERK under insulin or glucose stimulation in  $\beta$ -cells.** Intensity of the signals of western blotting in Fig. 9C quantified by densitometry (n = 3).

# Supplementary Fig. 1

- basal
- insulin + glucose
- insulin + glucose + LY294002
- insulin + glucose + OSI-906
- insulin + glucose + MK-2206
- insulin + glucose + U0126

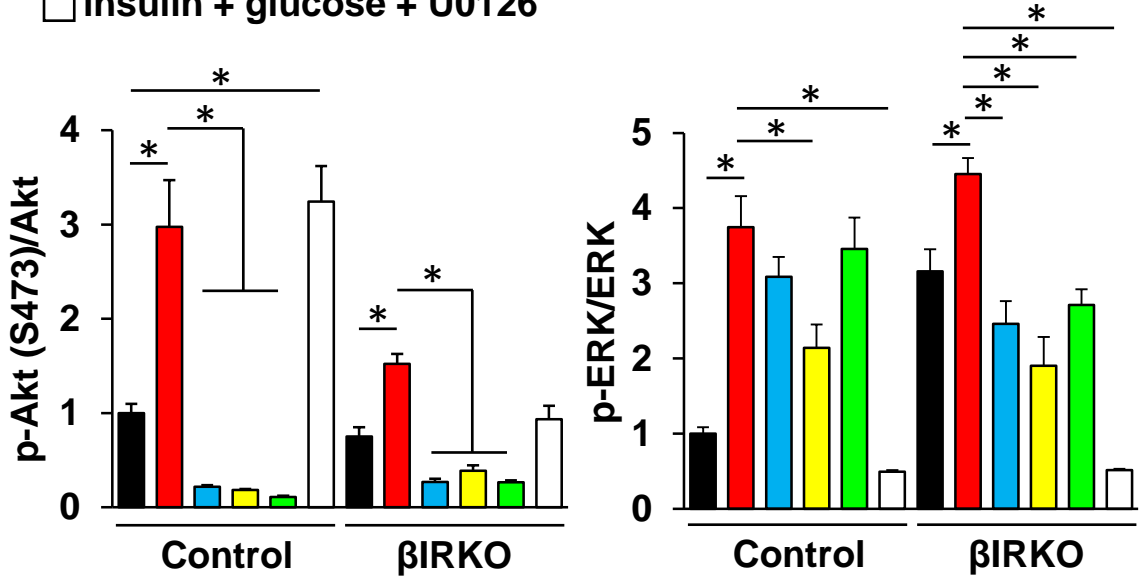

## Supplementary Fig. 2

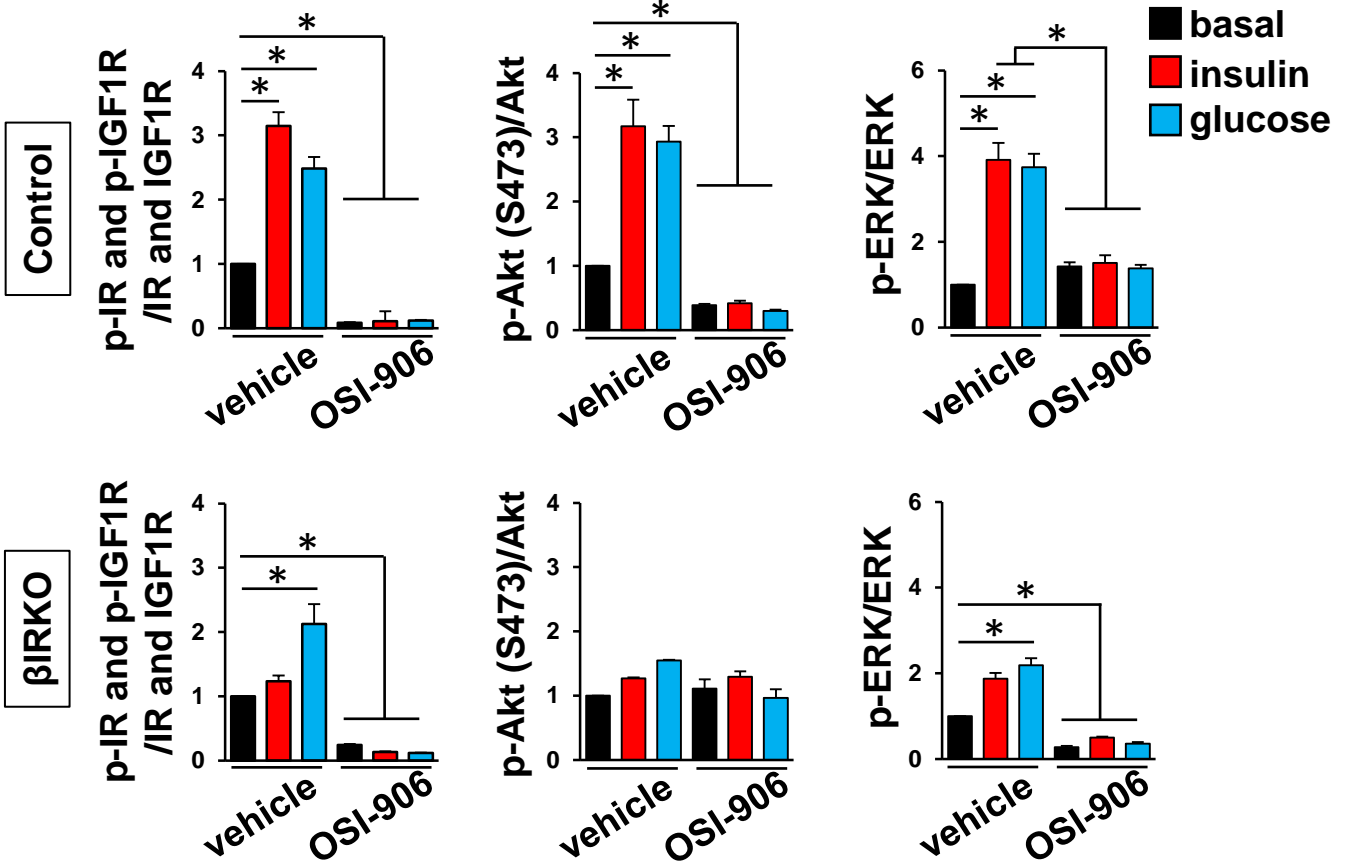

Supplement: 10.1074_M116.735738_jbc.M116.735738-1.pdf [file 10.1074_M116.735738_jbc.M116.735738-1.pdf]
